1                    **Less physical activity and more varied and disrupted sleep is**  
2                    **associated with a less favorable metabolic profile in adolescents**

3                    Vaka Rognvaldsdottir<sup>1</sup>, Robert J. Brychta<sup>2</sup>, Soffia M. Hrafnkelsdottir<sup>1</sup>, Kong Y. Chen<sup>2</sup>,  
4                    Sigurbjorn A. Arngrimsson<sup>1</sup>, Erlingur Johannsson<sup>1,3\*</sup>, Sigridur L. Guðmundsdottir<sup>1\*</sup>.

5  
6  
7                    <sup>1</sup> Center of Sport and Health Sciences, University of Iceland, Reykjavik, Iceland

8                    <sup>2</sup> Diabetes, Endocrinology and Obesity Branch, National Institute of Diabetes and Digestive  
9                    and Kidney Diseases, Bethesda, MD, USA

10                    <sup>3</sup> Department of Sport and Physical Activity, Western Norway University of Applied Sciences,  
11                    Bergen, Norway.

12  
13                    \* Erlingur Johannsson and Sigridur L Gudmundsdottir contributed equally to the work as last author.

14                    Corresponding author: Vaka Rognvaldsdottir [vakar@hi.is](mailto:vakar@hi.is)

15

16

17

18

19

20

21

22

## 23 **Abstract**

### 24 **Background**

25 Sleep and physical activity are modifiable behaviors that play an important role in preventing  
26 overweight, obesity, and metabolic health problems. Studies of the association between  
27 concurrent objective measures of sleep, physical activity, and metabolic risk factors among  
28 adolescents are limited.

### 29 **Objective**

30 The aim of the study was to examine the association between metabolic risk factors and  
31 objectively measured school day physical activity and sleep duration, quality, onset, and  
32 variability in adolescents.

### 33 **Materials and Methods**

34 We measured one school week of free-living sleep and physical activity with wrist actigraphy  
35 in 252 adolescents (146 girls), aged  $15.8 \pm 0.3$  years. Metabolic risk factors included body mass  
36 index, waist circumference, total body and trunk fat percentage, resting blood pressure, and  
37 fasting glucose and insulin levels. Multiple linear regression adjusted for sex, parental  
38 education, and day length was used to assess associations between metabolic risk factors and  
39 sleep and activity parameters.

### 40 **Results**

41 On average, participants went to bed at  $00:22 \pm 0.88$  hours and slept  $6.2 \pm 0.7$  hours/night, with  
42  $0.83 \pm 0.36$  hours of awakenings/night. However, night-to-night variability in sleep duration  
43 ( $0.87 \pm 0.57$  hours) and bedtime ( $0.79 \pm 0.58$  hours) was considerable. Neither average sleep  
44 duration nor mean bedtime was associated with any metabolic risk factors. However, greater  
45 night-to-night variability in sleep duration was associated with higher total body ( $\beta = 1.9 \pm 0.9$

46 %/h,  $p=0.03$ ) and trunk fat percentage ( $\beta=1.6\pm0.7$  %/h,  $p=0.02$ ), poorer sleep quality (more  
47 hours of awakening) was associated with higher systolic blood pressure ( $\beta=4.9\pm2.2$  mmHg/h,  
48  $p=0.03$ ), and less physical activity was associated with higher trunk fat percentage ( $p=0.04$ ) and  
49 insulin levels ( $p=0.01$ ).

## 50 **Conclusion**

51 Greater nightly variation in sleep, lower sleep quality, and less physical activity was associated  
52 with a less favorable metabolic profile in adolescents. These findings support the idea that,  
53 along with an adequate amount of sleep and physical activity, a regular sleep schedule is  
54 important to the metabolic health of adolescents.

55

56

57

58

59

60

61

62

63

64

65

66

67

68

69

## 70 **Introduction**

71           The prevalence of overweight in the world has nearly tripled from 1975-2016, with over  
72 39% of adults and 18% of children and adolescents being overweight or obese [1]. Greater total  
73 body and central adiposity is associated with increased risk of cardio-metabolic comorbidities,  
74 such as hypertension and diabetes [2, 3]. Prevalence of metabolic syndrome is high among  
75 obese children and adolescents and increases with higher central obesity [4]. Along with diet,  
76 sleep and physical activity have been identified as important modifiable risk factors implicated  
77 in the development of overweight, obesity, and metabolic health problems [5].

78           The importance of adequate sleep for health and daily functioning in adolescents is well  
79 established [6, 7], although most studies are based on subjective data. Most national and  
80 international guidelines focus on recommendations for sleep duration, since prior research has  
81 demonstrated that insufficient sleep duration during adolescence is associated with a variety of  
82 cognitive, psychological, and health risks, including higher body mass index (BMI) [8-10],  
83 greater body fat [11], and increased insulin resistance [12]. However, emerging evidence  
84 suggests that sleep quality [13-15] and timing may also affect adolescent cardiometabolic risk  
85 factors [7]. For instance, later bedtimes are associated with greater BMI [10, 16], body fat [11]  
86 and higher systolic blood pressure in children and adolescents [17]. Markers of irregular sleep  
87 schedules, such as high variability in sleep duration or greater shifts in sleep timing and duration  
88 on weekends, have also been associated with greater adiposity and abdominal obesity [18, 19]  
89 and higher BMI and insulin levels [20] in children and adolescents. Studies also suggest that  
90 long-term exposure to a disrupted sleep schedule [21] or low physical activity [22] can increase  
91 the risk of developing metabolic syndrome, while higher levels of physical activity in children  
92 and adolescents are associated with favorable body mass index, lower adiposity, and better  
93 cardio-metabolic health [23, 24]. However, since studies with simultaneous objective measures

94 of sleep, activity, and metabolic risk factors are sparse, it is not known whether physical activity  
95 and sleep contribute to a better cardiometabolic profile independently.

96 The aim of the study was to examine associations between metabolic risk factors and  
97 concurrent objective measures of free-living sleep and physical activity among Icelandic  
98 adolescents. We hypothesized that less activity, shorter sleep duration, poorer sleep quality, and  
99 more varied sleep schedules will associate with less favorable cardiometabolic profiles.

## 100 **Methods**

### 101 *Study design and data collection*

102 All students attending the second grade in six of the largest primary schools in  
103 Reykjavik, Iceland were invited to participate in a longitudinal cohort studying health,  
104 cardiovascular fitness, and physical activity initiated at seven to eight years of age (N = 320,  
105 82% participated) [25]. At the age of 15, concurrent measurement of sleep and activity with  
106 wrist activity was introduced [26] and students from the cohort and all others enrolled in the  
107 same grade at the respective schools were invited to participate (N = 411); 315 agreed (response  
108 rate 77%), and 252 had complete data for questionnaire, body composition, sleep, and physical  
109 activity measurements. Two participants were missing waist circumference and blood pressure  
110 measurements and 13 refused blood draws for serum glucose and insulin. Study participation  
111 is shown in Figure 1.

112

### 113 **Figure 1. Flow chart describing study participation.**

114 Written informed consent was obtained from all participants and their guardians. The study  
115 was approved by the National Bioethics Committee, the Icelandic Data Protection Authority  
116 (Study number: VSNb2015020013/13.07), and the Icelandic Radiation Safety Authority. The  
117 study was conducted in agreement with the guidance provided in the Declaration of Helsinki.

118 *Sleep and physical activity parameters*

119 Free-living sleep and physical activity were measured with a wrist-worn accelerometer  
120 (GT3X+, Actigraph Inc., Pensacola, FL, USA). The accelerometer was placed on the non-  
121 dominant wrist at school and the participant was asked to wear it continuously for a week.  
122 Physical activity counts and sleep duration, timing, and quality, were computed with Actilife  
123 software version 6.13.0 (Actigraph). The Sadeh algorithm, validated for adolescents [27], was  
124 used to detect sleep onsets and awakenings, which were visually inspected and adjusted as  
125 necessary by two expert scorers based on daily sleep logs maintained during the week of  
126 actigraphy. Wear time and vector magnitude of physical activity counts were computed in  
127 MATLAB (version R2013a MathWorks, Natick, MA, USA) using previously described  
128 algorithms [28, 29]. Since only one week of accelerometer data was collected, we focused our  
129 analysis on school days (Monday-Friday) and nights (Sunday-Thursday) and did not include  
130 data for weekends or holidays. Participants with  $\geq 3$  school days and wear time  $\geq 14$  hours, were  
131 included in the analyses. Sleep and activity parameters are defined in Table 1.

132 **Table 1. Sleep and physical activity parameters.**

| <b>Actigraphy parameter</b>   | <b>Definition</b>                                                       |
|-------------------------------|-------------------------------------------------------------------------|
| Sleep duration                | Time spent asleep between sleep onset and awakening (hours/night)       |
| Variability in sleep duration | Night-to-night variation (standard deviation) of sleep duration (hours) |
| Bedtime                       | Time of sleep onset (clock time)                                        |
| Variability in bedtime        | Night-to-night variation (standard deviation) of sleep onset (hours)    |
| WASO                          | Wake time after sleep onset (hours/night)                               |
| Physical activity             | Activity/wear time (3D-counts/minutes of wear/day)                      |

133

134 *Body composition*

135 Height, weight, and waist circumference was measured at participants' schools.  
136 Standing height was measured with a stadiometer (Seca model 217, Seca Ltd. Birmingham,  
137 UK) to the nearest 0.1 cm. Body weight was measured to the nearest 0.1 kg using a scale (Seca  
138 model 813, Seca Ltd. Birmingham, UK) with participants wearing light clothes. BMI was  
139 calculated by dividing weight by height squared ( $\text{kg}/\text{m}^2$ ). Waist circumference was measured

140 to the nearest 0.1 cm using a tape measure next to skin at the narrowest place between the lowest  
141 rib and the iliac crest. Fat-free and fat mass were measured with dual-energy X-ray  
142 absorptiometry (DXA) using a GE LUNAR scanner (General Electric Lunar iDXA) at the  
143 Icelandic Heart Association. All DXA measurements were performed by a certified radiologist.  
144 Body fat percentage was calculated by dividing total fat mass by the total body mass (fat mass  
145 + lean mass + bone mineral content) and trunk fat percentage was calculated by dividing the  
146 total trunk fat mass by total trunk mass. Resting blood pressure was measured on the left arm  
147 of seated participants and the average of three measurements was used for analysis.

#### 148 *Serum measures*

149 Fasting blood samples were obtained using standard procedures after overnight fasting;  
150 samples were analyzed for glucose and insulin. Insulin (mU/L) in serum was measured using  
151 the INSULIN assay from Roche, a sandwich electrochemiluminescence immunoassay ECLIA  
152 on Cobas e 411 (Roche, Switzerland). The inter-assay coefficient of variation was < 5.06%  
153 using a frozen serum pool and < 2.36% using quality control samples from Roche. Glucose  
154 (mmol/L) in serum was measured using the GLUC2 assay from Roche, an enzymatic reference  
155 method with hexokinase. The measurements were done on a Cobas e 311 (Roche, Switzerland).  
156 The inter-assay coefficient of variation was <1.65% using a frozen serum pool and <1.66%  
157 using quality control samples from Roche.

#### 158 *Survey questions and environmental data*

159 Students provided the educational attainment of both mother and father from the  
160 following options (presented in Icelandic): 1 = “elementary degree”, 2 = “secondary degree”, 3  
161 = “trade school degree”, 4 = “university degree”, 5 = “other”, 6 = “do not know”, 7 = “do not  
162 want to answer”. For the current analysis, responses were recoded into a binary variable: 1 =  
163 “parent with a university degree” or 0 = “no parent with a university degree”, as described

164 previously [30]. Information on day length (hours of day light) was obtained from National  
165 Oceanic and Atmospheric Administration (NOAA) Earth System Research Laboratory Solar  
166 Calculator [31].

### 167 *Statistical analyses*

168 Chi-squared tests and unpaired T-tests showed no differences in the gender distribution,  
169 parental education, age, body composition, or cardiometabolic risk markers of participants with  
170 and without complete actigraphy data (Table S1). T-test for independent samples was used to  
171 assess whether participant characteristics, sleep parameters, and physical activity differed  
172 between the sexes or by parental educational attainment. Separate multiple linear regression  
173 models adjusted for sex, parental education, and day length, were used to explore the  
174 associations of each sleep and activity parameter with body composition parameters (BMI, total  
175 body fat percentage and trunk fat percentage) and metabolic risk factors (insulin, glucose, blood  
176 pressure). In further analysis, body composition and metabolic risk factors were included as  
177 response variables while sleep duration, WASO, sleep variability, and physical activity were  
178 all simultaneously included as predictor variables in models additionally adjusted for sex,  
179 parental education, and day length. In a separate analysis, body composition and metabolic risk  
180 factors were again included as response variables while bedtime and bedtime variability were  
181 simultaneously included as predictor variables in models additionally adjusted for physical  
182 activity, sex, parental education, and day length. Statistical analyses were carried out in Rstudio  
183 (Boston, MA, USA, Version 1.1.456) using R statistical software (<https://www.r-project.org/>,  
184 Version 3.5.1). Statistical significance level was set at  $p < 0.05$ .

### 185 **Results**

186 Participant characteristics are shown in Table 2. Although boys were taller and heavier  
187 than girls, BMI (overall mean =  $21.9 \pm 3.0$  kg/m<sup>2</sup>) did not differ between the sexes. Overall, 87%



188 of the participants had BMI below 25 kg/m<sup>2</sup>, 10% had 25 ≤ BMI <30 kg/m<sup>2</sup>, and 2.5% had BMI  
 189 ≥ 30 kg/m<sup>2</sup>. Boys had lower total body and trunk fat percentage, smaller waist circumference,  
 190 and slightly higher systolic pressure, but there were no sex differences in age, parental  
 191 educational attainment, or serum insulin and glucose levels. Participants with and without a  
 192 parent with a university degree did not differ in characteristics, body composition, blood  
 193 pressure, or serum insulin and glucose (Table S2).

194 **Table 2. Participants characteristics.**

|                                      | All (252)    | Boys (106)  | Girls (146)  | p (Boys vs Girls) |
|--------------------------------------|--------------|-------------|--------------|-------------------|
| <b>Subjects Characteristics</b>      |              |             |              |                   |
| Age, years                           | 15.8 ± 0.3   | 15.8 ± 0.3  | 15.9 ± 0.3   | 0.12              |
| Height, cm                           | 172.0 ± 8.0  | 178.5 ± 6.0 | 167.3 ± 5.6  | <0.001            |
| Weight, kg                           | 64.8 ± 10.6  | 68.9 ± 10.3 | 61.9 ± 9.7   | <0.001            |
| Body mass index, kg/m <sup>2</sup>   | 21.9 ± 3.0   | 21.6 ± 2.9  | 22.1 ± 3.1   | 0.21              |
| Body fat, %                          | 25.1 ± 8.6   | 18.2 ± 6.6  | 30.2 ± 5.9   | <0.001            |
| Trunk fat, %                         | 23.6 ± 9.6   | 17.0 ± 7.8  | 28.3 ± 7.8   | <0.001            |
| Waist circumference, cm*             | 70.6 ± 7.1   | 73.5 ± 6.2  | 68.6 ± 7.1   | <0.001            |
| Diastolic pressure, mmHg*            | 70.8 ± 5.5   | 70.2 ± 5.6  | 71.2 ± 5.3   | 0.21              |
| Systolic pressure, mmHg*             | 115.1 ± 12.8 | 118.6 ± 9.9 | 112.6 ± 14.0 | <b>0.03</b>       |
| Glucose, mmol/L**                    | 4.9 ± 0.5    | 4.9 ± 0.4   | 4.9 ± 0.5    | 0.57              |
| Insulin, mU/L**                      | 9.7 ± 4.7    | 8.4 ± 3.7   | 10.6 ± 5.2   | 0.73              |
| Parent with university degree, N (%) | 193 (76.6%)  | 83 (78.3%)  | 110 (75.3%)  | 0.69              |

Data presented as mean ± standard deviation; \*250 participants (105 Boys, 145 Girls); \*\*239 participants (101 Boys, 138 Girls); Boldface type indicates significant difference (p<0.05).

195  
 196 Sleep and physical activity parameters did not differ between the sexes (Table 3) or  
 197 between those with or without a parent with a university degree (Table S2). On average,  
 198 participants spent 7.05 ± 0.82 hours in bed on school nights, going to bed at 00:22 ± 0.88 hours  
 199 and rising at 07:27 ± 0.62 hours. While in bed, participants were awake 0.83 ± 0.36 hours and  
 200 asleep 6.19 ± 0.73 hours. Night-to-night variations in bedtime and sleep duration were 0.79 ±  
 201 0.58 hours and 0.87 ± 0.57 hours, respectively.

202

203

204

205 **Table 3. Summary sleep and physical activity parameters.**

|                                           | <b>All (252)</b> | <b>Boys (106)</b> | <b>Girls (146)</b> | <b>p (Boys Vs. Girls)</b> |
|-------------------------------------------|------------------|-------------------|--------------------|---------------------------|
| Time in bed, hours/night                  | 7.05 ± 0.82      | 6.99 ± 0.84       | 7.09 ± 0.80        | 0.34                      |
| Sleep duration, hours/night               | 6.19 ± 0.73      | 6.13 ± 0.78       | 6.24 ± 0.70        | 0.28                      |
| Bedtime, hh:mm ± hours                    | 00:22 ± 0.88     | 00:28 ± 0.90      | 00:18 ± 0.87       | 0.12                      |
| Rise time, hh:mm ± hours                  | 07:27 ± 0.62     | 07:30 ± 0.68      | 07:24 ± 0.57       | 0.25                      |
| WASO, hours/night                         | 0.83 ± 0.36      | 0.83 ± 0.35       | 0.83 ± 0.36        | 0.98                      |
| Variability in sleep duration, hours      | 0.87 ± 0.57      | 0.92 ± 0.65       | 0.84 ± 0.51        | 0.31                      |
| Variability in bedtime, hours             | 0.79 ± 0.58      | 0.85 ± 0.68       | 0.74 ± 0.49        | 0.17                      |
| Activity, 1000 counts/minutes of wear/day | 2.21 ± 0.50      | 2.24 ± 0.47       | 2.18 ± 0.52        | 0.42                      |
| Wear time, hours/night                    | 23.76 ± 0.39     | 23.69 ± 0.50      | 23.81 ± 0.29       | <b>0.03</b>               |
| Valid days, days                          | 4.6 ± 0.6        | 4.5 ± 0.7         | 4.7 ± 0.5          | 0.13                      |
| Day length, hours/day                     | 17.46 ± 1.87     | 17.35 ± 1.86      | 17.54 ± 1.88       | 0.42                      |

Data presented as mean ± standard deviation; WASO: wake after sleep onset; Boldface type indicates significant difference (p<0.05).

207           The association of metabolic risk factors to physical activity and sleep duration, quality,  
208 and variability are shown in Table 4. Average sleep duration was not associated with body  
209 composition or metabolic parameters. However, the nightly variability of sleep duration was  
210 positively associated with both total body and trunk fat percentages. WASO, an indicator of  
211 sleep quality, was not associated with body composition but positively associated with systolic  
212 blood pressure. Physical activity was negatively associated with trunk fat percentage and fasting  
213 insulin levels. Neither physical activity nor any of the sleep parameters was associated with  
214 fasting plasma glucose. All significant associations persisted when average sleep duration,  
215 WASO, nightly sleep variability, and physical activity were included in the same model (Table  
216 4, combined model).

217

218

219

220

221

222

223

224

225 **Table 4. Association of metabolic risk factors to physical activity and sleep duration, quality, and variability**

226

|                                    | Sleep duration, $\beta \pm SE$ (p) | WASO, $\beta \pm SE$ (p)                   | Nightly variability in sleep duration, $\beta \pm SE$ (p) | Physical activity, $\beta \pm SE$ (p)        |
|------------------------------------|------------------------------------|--------------------------------------------|-----------------------------------------------------------|----------------------------------------------|
| Body mass index, kg/m <sup>2</sup> |                                    |                                            |                                                           |                                              |
| Individual model                   | -0.201 $\pm$ 0.262 (0.44)          | -0.812 $\pm$ 0.529 (0.13)                  | 0.612 $\pm$ 0.332 (0.07)                                  | 0.567 $\pm$ 0.394 (0.15)                     |
| Combined model                     | -0.274 $\pm$ 0.26 (0.29)           | -0.888 $\pm$ 0.529 (0.09)                  | 0.518 $\pm$ 0.328 (0.12)                                  | 0.542 $\pm$ 0.382 (0.16)                     |
| Trunk fat, %                       |                                    |                                            |                                                           |                                              |
| Individual model                   | -0.675 $\pm$ 0.674 (0.32)          | -2.427 $\pm$ 1.361 (0.08)                  | <b>1.854 <math>\pm</math> 0.854 (0.03)</b>                | <b>-2.057 <math>\pm</math> 1.014 (0.04)</b>  |
| Combined model                     | -0.434 $\pm$ 0.677 (0.52)          | -2.189 $\pm$ 1.378 (0.11)                  | <b>2.161 <math>\pm</math> 0.847 (0.01)</b>                | <b>-2.115 <math>\pm</math> 0.989 (0.03)</b>  |
| Total body fat, %                  |                                    |                                            |                                                           |                                              |
| Individual model                   | -0.695 $\pm$ 0.537 (0.20)          | -1.885 $\pm$ 1.084 (0.08)                  | <b>1.606 <math>\pm</math> 0.680 (0.02)</b>                | -1.478 $\pm$ 0.808 (0.07)                    |
| Combined model                     | -0.521 $\pm$ 0.539 (0.33)          | -1.722 $\pm$ 1.098 (0.12)                  | <b>1.824 <math>\pm</math> 0.673 (0.01)</b>                | -1.514 $\pm$ 0.789 (0.06)                    |
| Waist circumference, cm            |                                    |                                            |                                                           |                                              |
| Individual model                   | -0.202 $\pm$ 0.594 (0.73)          | -1.729 $\pm$ 1.206 (0.15)                  | 1.049 $\pm$ 0.765 (0.17)                                  | -0.422 $\pm$ 0.894 (0.64)                    |
| Combined model                     | -0.169 $\pm$ 0.587 (0.77)          | -1.724 $\pm$ 1.200 (0.15)                  | 1.134 $\pm$ 0.752 (0.13)                                  | -0.473 $\pm$ 0.867 (0.59)                    |
| Diastolic pressure, mmHg           |                                    |                                            |                                                           |                                              |
| Individual model                   | 0.202 $\pm$ 0.484 (0.68)           | 0.774 $\pm$ 0.982 (0.43)                   | 0.156 $\pm$ 0.623 (0.80)                                  | -0.964 $\pm$ 0.728 (0.19)                    |
| Combined model                     | 0.319 $\pm$ 0.476 (0.50)           | 0.879 $\pm$ 0.978 (0.37)                   | 0.284 $\pm$ 0.613 (0.64)                                  | -1.089 $\pm$ 0.701 (0.12)                    |
| Systolic pressure, mmHg            |                                    |                                            |                                                           |                                              |
| Individual model                   | 1.045 $\pm$ 1.095 (0.34)           | <b>4.865 <math>\pm</math> 2.221 (0.03)</b> | -1.824 $\pm$ 1.408 (0.20)                                 | 0.835 $\pm$ 1.646 (0.61)                     |
| Combined model                     | 0.987 $\pm$ 1.086 (0.36)           | <b>4.865 <math>\pm</math> 2.213 (0.03)</b> | -2.015 $\pm$ 1.395 (0.15)                                 | 0.642 $\pm$ 1.608 (0.69)                     |
| Glucose, mmol/L                    |                                    |                                            |                                                           |                                              |
| Individual model                   | -0.077 $\pm$ 0.042 (0.07)          | -0.022 $\pm$ 0.086 (0.80)                  | -0.008 $\pm$ 0.054 (0.88)                                 | -0.026 $\pm$ 0.064 (0.68)                    |
| Combined model                     | -0.074 $\pm$ 0.041 (0.08)          | -0.020 $\pm$ 0.085 (0.82)                  | -0.008 $\pm$ 0.053 (0.89)                                 | -0.002 $\pm$ 0.061 (0.97)                    |
| Insulin, mU/L                      |                                    |                                            |                                                           |                                              |
| Individual model                   | 0.015 $\pm$ 0.409 (0.97)           | -0.726 $\pm$ 0.826 (0.38)                  | 0.558 $\pm$ 0.516 (0.28)                                  | <b>-1.813 <math>\pm</math> 0.613 (0.003)</b> |
| Combined model                     | 0.255 $\pm$ 0.410 (0.53)           | -0.486 $\pm$ 0.839 (0.56)                  | 0.851 $\pm$ 0.513 (0.10)                                  | <b>-1.901 <math>\pm</math> 0.588 (0.001)</b> |

Sleep duration is in units of hours/nights; WASO: wake after sleep onset, in hours/night; Variability in sleep duration is in units of hours; Physical activity is in units of 1000 counts/minutes of wear/day; Individual models adjusted for sex, parental education, and day length; Combined models include sleep duration, WASO, nightly variability in sleep duration, physical activity, sex, parental education, and day length; Boldface type indicates significant relationships (p<0.05).

227

228           The association of metabolic risk factors to average bedtime and nightly bedtime  
229    variability is shown in Table 5. Mean bedtime was not associated with any of the body  
230    composition or metabolic parameters after adjusting for sex, parental education, and day length.  
231    However, using the same covariates, bedtime variability was positively associated with waist  
232    circumference and total body and trunk fat percentage and negatively associated with systolic  
233    blood pressure. All significant relationships persisted when average bedtime and nightly  
234    bedtime variability were included in a combined model, adjusted for physical activity, sex,  
235    parental education, and day length.

236

238 **Table 5. Association of metabolic risk factors to average bedtime and nightly variability**  
 239 **in bedtime**

|                                    | <b>Bedtime, <math>\beta \pm SE</math> (p)</b> | <b>Nightly variability in bedtime, <math>\beta \pm SE</math> (p)</b> |
|------------------------------------|-----------------------------------------------|----------------------------------------------------------------------|
| Body mass index, kg/m <sup>2</sup> |                                               |                                                                      |
| Individual model                   | 0.222 $\pm$ 0.221 (0.31)                      | 0.622 $\pm$ 0.327 (0.06)                                             |
| Combined model                     | 0.182 $\pm$ 0.220 (0.41)                      | 0.632 $\pm$ 0.328 (0.06)                                             |
| Trunk fat, %                       |                                               |                                                                      |
| Individual model                   | 0.454 $\pm$ 0.576 (0.43)                      | <b>2.286 <math>\pm</math> 0.844 (0.007)</b>                          |
| Combined model                     | 0.396 $\pm$ 0.567 (0.49)                      | <b>2.151 <math>\pm</math> 0.843 (0.011)</b>                          |
| Total body fat, %                  |                                               |                                                                      |
| Individual model                   | 0.479 $\pm$ 0.458 (0.30)                      | <b>2.096 <math>\pm</math> 0.669 (0.002)</b>                          |
| Combined model                     | 0.417 $\pm$ 0.450 (0.36)                      | <b>1.987 <math>\pm</math> 0.669 (0.003)</b>                          |
| Waist circumference, cm            |                                               |                                                                      |
| Individual model                   | 0.069 $\pm$ 0.501 (0.89)                      | <b>1.483 <math>\pm</math> 0.734 (0.044)</b>                          |
| Combined model                     | 0.011 $\pm$ 0.501 (0.98)                      | <b>1.463 <math>\pm</math> 0.740 (0.049)</b>                          |
| Diastolic pressure, mmHg           |                                               |                                                                      |
| Individual model                   | -0.093 $\pm$ 0.407 (0.82)                     | -0.299 $\pm$ 0.601 (0.62)                                            |
| Combined model                     | -0.046 $\pm$ 0.408 (0.91)                     | -0.349 $\pm$ 0.603 (0.56)                                            |
| Systolic pressure, mmHg            |                                               |                                                                      |
| Individual model                   | -1.342 $\pm$ 0.926 (0.15)                     | <b>-3.017 <math>\pm</math> 1.359 (0.03)</b>                          |
| Combined model                     | -1.223 $\pm$ 0.924 (0.19)                     | <b>-2.865 <math>\pm</math> 1.365 (0.04)</b>                          |
| Glucose, mmol/L                    |                                               |                                                                      |
| Individual model                   | 0.041 $\pm$ 0.035 (0.24)                      | 0.028 $\pm$ 0.053 (0.60)                                             |
| Combined model                     | 0.041 $\pm$ 0.036 (0.26)                      | 0.025 $\pm$ 0.053 (0.64)                                             |
| Insulin, mU/L                      |                                               |                                                                      |
| Individual model                   | 0.068 $\pm$ 0.349 (0.85)                      | 0.179 $\pm$ 0.523 (0.73)                                             |
| Combined model                     | 0.095 $\pm$ 0.343 (0.78)                      | 0.062 $\pm$ 0.516 (0.91)                                             |

Bedtime is in units of hours from midnight; Variability in bedtime is in units of hours; Individual models adjusted for sex, parental education, and day length; Combined models include bedtime, nightly variability in bedtime, physical activity, sex, parental education, and day length; Boldface type indicates significant relationships ( $p < 0.05$ ).

240

## 241 **Discussion**

242 We studied the free-living sleep and physical activity patterns on school days in a  
 243 sample of 15-year-old Icelandic boys and girls, and, as hypothesized, we found that greater  
 244 nightly variation in sleep, lower sleep quality, and less physical activity was associated with  
 245 less favorable indicators of metabolic health. Surprisingly, neither mean bedtime nor average  
 246 sleep duration on school nights was associated with any of the cardiometabolic risk factors  
 247 measured in our study. These findings support the idea that, along with an adequate amount of  
 248 sleep and physical activity, a regular sleep schedule is important to the cardiometabolic health  
 249 of adolescents.

250 We found that the participants in our study had considerable nightly variation in sleep  
251 duration (0.87 hours) and bedtime (0.79 hours) on school nights and that higher nightly  
252 variability in these parameters was related to greater measures of adiposity. These findings are  
253 consistent with previous studies of sleep variability and metabolic health, although to date study  
254 of this relationship in adolescents has been sparse. He et al., also found that high variability in  
255 sleep duration was associated with greater central adiposity in a group of similarly aged  
256 adolescents, even after controlling for food intake [18]. However, there were several notable  
257 differences in our regression analyses: (1) we included a measure of physical activity, a well-  
258 documented contributor to body composition and metabolic health, and (2) we excluded non-  
259 school nights of sleep, when sleep patterns are typically less regular and very different from  
260 school night for adolescents [26]. The exclusion of non-school nights from our analysis may  
261 partly explain the lower night-to-night variation in sleep duration for our participants compared  
262 to He, et. al. (0.87 hours vs. 1.2 hours) [18]. Despite these differences, we observed a similar  
263 robust association between sleep variability and adiposity. For instance, our combined  
264 regression model indicates that a 30 min increase in variability in nightly sleep duration would  
265 lead to a 1.1% increase in trunk fat and a 0.9% increase in total body fat. All else being equal,  
266 a participant in the ninetieth percentile of night-to-night sleep variability in our cohort (1.49 h  
267 over the school week) could be expected to have 2.12 percentage points higher body fat than a  
268 participant in the tenth percentile (0.33 h over the school week). The similarity between  
269 relationships with variability in sleep duration and bedtime was also not surprising, since the  
270 two measures were highly correlated ( $r=0.72$ ,  $p<0.0001$ ). These findings reinforce the idea that  
271 adolescents should maintain a regular sleep schedule.

272 Contrary to our hypothesis, we did not observe a relationship between mean bedtime or  
273 average sleep duration and metabolic risk factors. While a number of previous studies have  
274 noted a positive association between self-reported short sleep and obesity in adolescents [32],

275 some more recent studies find a lack of this relationship while measuring sleep with actigraphy  
276 [17, 18]. In agreement with our findings, He et al found that high variability in sleep duration,  
277 but not mean sleep duration, was associated with greater central adiposity [18]. However, we  
278 did not find an association between average bedtime and blood pressure, as demonstrated by  
279 Mi, et al in a group of mostly younger adolescents ( $12.4 \pm 2.6$  y) [17]. It is also worth noting  
280 that our Icelandic cohort was generally lean, with a 12% prevalence of overweight and obesity.  
281 Thus, our results may reflect a more subtle relationship between sleep parameters and body  
282 composition than found in studies with greater prevalence of overweight and obesity.

283 We also found that more wakefulness during the sleep period (WASO) was associated  
284 with higher systolic blood pressure. This agrees with a previous cross-sectional analysis of  
285 healthy adolescents which reported that lower actigraphy-measured sleep quality was  
286 associated with pre-hypertension and hypertension [33]. Surprisingly, increased variability in  
287 bedtime was associated with lower systolic blood pressure. The meaning of those contradicting  
288 associations with systolic blood pressure is unclear and needs further investigation. Pediatric  
289 systolic blood pressure is known to vary due to a variety of reasons [34] and further  
290 investigation of the effect of bedtime may elucidate the relationship between the two variables.

291 The positive influence of physical activity and the metabolic health of adolescents is  
292 well documented [35]. Our finding that wrist-actigraphy measured physical activity was  
293 inversely associated with trunk fat percentage and serum insulin levels is largely confirmatory  
294 of previous work and consistent with our hypothesis. To put these findings in perspective, all  
295 else being equal, one would expect those with a physical activity level 30% above the group  
296 mean (approximately the ninetieth percentile for this cohort) to have 2.3 mU/L lower fasting  
297 insulin and 2.6% lower trunk fat than those with an activity level 30% below the group mean  
298 (approximately the tenth percentile). Although these are substantial cross-sectional differences,



299 they are smaller than the changes in these measures observed during aerobic exercise  
300 interventions in adolescents [36].

301 The potential causal pathways between irregular sleep patterns and increased body fat  
302 are not yet clear. Study of healthy non-overweight children (5-12 years) found that shorter sleep  
303 duration and poor sleep continuity were associated with overeating and other behavior related  
304 to obesity risk [37]. Sleep timing, duration, and quality are known to affect regulatory  
305 hormones, such as cortisol and growth hormone, as well as appetite regulatory hormones leptin  
306 and ghrelin [38]. Thus, high variability in sleep schedule may affect appetite control and  
307 contribute to greater adiposity and markers of poorer metabolic health. However, we did not  
308 have a measure of food intake and, thus, cannot explore potential relationships between diet,  
309 sleep variability, and metabolic health and, based on our cross-sectional study design, we cannot  
310 rule out reverse causality.

311 A strength of this study is the objective measurement of sleep patterns, physical activity,  
312 and body composition. Most previous studies of sleep in this age group have relied on self- or  
313 parent-report of typical time in bed or bed- and rise-times. Self-reported measures tend to over-  
314 report sleep time [39, 40] and under-report awakenings during sleep [40]. Wrist actigraphy has  
315 been validated against laboratory-based polysomnography in this age group and shown to have  
316 higher accuracy than self-report for sleep duration[41] and awakenings [42]. DXA is a highly  
317 accurate method of classifying body tissues and assessing regional body fat distribution [43-  
318 45].

319 This study has some limitations. The sample size was relatively small (n=251).  
320 However, it represents 18.6% of the 15-year-old population of Reykjavik in 2015 (n=1355)  
321 [46]. The cross-sectional nature precludes study of the temporal relationships between sleep,  
322 physical activity, and metabolic factors. All measurements were collected from spring until

323 early summer, a period of drastic change in day length and weather in Iceland which could  
324 affect sleep timing [47] and physical activity level [47, 48]. Earlier analyses of this cohort found  
325 no association between sleep duration and day length [28] but a positive association between  
326 physical activity and day length [29]. We attempted to mitigate the influence of day length by  
327 statistically controlling for it in all regression models. Finally, our sample is mostly lean and  
328 racially and ethnically homogeneous, potentially limiting the generalizability of the results to  
329 other populations.

### 330 **Conclusion**

331 Greater nightly variation in sleep duration, lower sleep quality, and less physical activity  
332 was associated with a less favorable metabolic profile in 15-year-old adolescents, highlighting  
333 the importance of physical activity and maintaining a regular sleep schedule. Further research  
334 is needed to determine the longitudinal relationship between sleep, physical activity, and  
335 metabolic health from adolescence into adulthood.

336

### 337 **Acknowledgments**

338 The authors would like to thank the participants of the study, the staff at participating schools  
339 and the MS students involved in the data collection. They also thank the Icelandic Heart  
340 Association, The Icelandic Centre for Research (RANNIS) and the University of Iceland  
341 Research Fund for financial support.

342

## 343 References

- 344 1. Organization WH. Obesity and Overweight: World Health Organization; 2018 [cited 2019].  
345 Available from: <https://www.who.int/news-room/fact-sheets/detail/obesity-and-overweight>.
- 346 2. Tchernof A, Despres JP. Pathophysiology of human visceral obesity: an update. *Physiological*  
347 *reviews*. 2013;93(1):359-404. Epub 2013/01/11. doi: 10.1152/physrev.00033.2011. PubMed PMID:  
348 23303913.
- 349 3. Fox CS, Massaro JM, Hoffmann U, Pou KM, Maurovich-Horvat P, Liu CY, et al. Abdominal  
350 visceral and subcutaneous adipose tissue compartments: association with metabolic risk factors in the  
351 Framingham Heart Study. *Circulation*. 2007;116(1):39-48. Epub 2007/06/20. doi:  
352 10.1161/circulationaha.106.675355. PubMed PMID: 17576866.
- 353 4. Cali AM, Caprio S. Ectopic fat deposition and the metabolic syndrome in obese children and  
354 adolescents. *Horm Res*. 2009;71 Suppl 1:2-7. Epub 2009/01/30. doi: 10.1159/000178028. PubMed  
355 PMID: 19153496.
- 356 5. Hruby A, Hu FB. The Epidemiology of Obesity: A Big Picture. *Pharmacoeconomics*.  
357 2015;33(7):673-89. Epub 2014/12/05. doi: 10.1007/s40273-014-0243-x. PubMed PMID: 25471927;  
358 PubMed Central PMCID: PMC4859313.
- 359 6. Bin YS, Marshall NS, Glozier N. The burden of insomnia on individual function and  
360 healthcare consumption in Australia. *Australian and New Zealand journal of public health*.  
361 2012;36(5):462-8. Epub 2012/10/03. doi: 10.1111/j.1753-6405.2012.00845.x. PubMed PMID:  
362 23025369.
- 363 7. Hirshkowitz M, Whiton K, Albert SM, Alessi C, Bruni O, DonCarlos L, et al. National Sleep  
364 Foundation's updated sleep duration recommendations: final report. *Sleep Health*. 2015;1(4):233-43.  
365 doi: <http://dx.doi.org/10.1016/j.sleh.2015.10.004>.
- 366 8. Knutson KL, Lauderdale DS. Sociodemographic and behavioral predictors of bed time and  
367 wake time among US adolescents aged 15 to 17 years. *The Journal of pediatrics*. 2009;154(3):426-30,  
368 30.e1. Epub 2008/10/14. doi: 10.1016/j.jpeds.2008.08.035. PubMed PMID: 18849051; PubMed  
369 Central PMCID: PMC2783185.
- 370 9. Chaput JP, Janssen I. Sleep duration estimates of Canadian children and adolescents. *Journal*  
371 *of sleep research*. 2016. Epub 2016/03/31. doi: 10.1111/jsr.12410. PubMed PMID: 27027988.
- 372 10. Golley RK, Maher CA, Matricciani L, Olds TS. Sleep duration or bedtime? Exploring the  
373 association between sleep timing behaviour, diet and BMI in children and adolescents. *International*  
374 *journal of obesity (2005)*. 2013;37(4):546-51. Epub 2013/01/09. doi: 10.1038/ijo.2012.212. PubMed  
375 PMID: 23295498.
- 376 11. Garaulet M, Ortega FB, Ruiz JR, Rey-Lopez JP, Beghin L, Manios Y, et al. Short sleep  
377 duration is associated with increased obesity markers in European adolescents: effect of physical  
378 activity and dietary habits. The HELENA study. *International journal of obesity (2005)*.  
379 2011;35(10):1308-17. Epub 2011/07/28. doi: 10.1038/ijo.2011.149. PubMed PMID: 21792170.
- 380 12. Matthews KA, Dahl RE, Owens JF, Lee L, Hall M. Sleep duration and insulin resistance in  
381 healthy black and white adolescents. *Sleep*. 2012;35(10):1353-8. Epub 2012/10/02. doi:  
382 10.5665/sleep.2112. PubMed PMID: 23024433; PubMed Central PMCID: PMC3443761.
- 383 13. Pacheco SR, Miranda AM, Coelho R, Monteiro AC, Braganca G, Loureiro HC. Overweight in  
384 youth and sleep quality: is there a link? *Arch Endocrinol Metab*. 2017;61(4):367-73. Epub 2017/06/29.  
385 doi: 10.1590/2359-3997000000265. PubMed PMID: 28658343.
- 386 14. Nedeltcheva AV, Scheer FA. Metabolic effects of sleep disruption, links to obesity and  
387 diabetes. *Curr Opin Endocrinol Diabetes Obes*. 2014;21(4):293-8. Epub 2014/06/18. doi:  
388 10.1097/med.000000000000082. PubMed PMID: 24937041; PubMed Central PMCID:  
389 PMC4370346.

- 390 15. Bonanno L, Metro D, Papa M, Finzi G, Maviglia A, Sottile F, et al. Assessment of sleep and  
391 obesity in adults and children: Observational study. *Medicine (Baltimore)*. 2019;98(46):e17642. Epub  
392 2019/11/15. doi: 10.1097/md.00000000000017642. PubMed PMID: 31725607.
- 393 16. Roenneberg T, Allebrandt KV, Meroow M, Vetter C. Social jetlag and obesity. *Current*  
394 *biology : CB*. 2012;22(10):939-43. Epub 2012/05/15. doi: 10.1016/j.cub.2012.03.038. PubMed PMID:  
395 22578422.
- 396 17. Mi SJ, Kelly NR, Brychta RJ, Grammer AC, Jaramillo M, Chen KY, et al. Associations of  
397 sleep patterns with metabolic syndrome indices, body composition, and energy intake in children and  
398 adolescents. *Pediatric obesity*. 2019:e12507. Epub 2019/02/01. doi: 10.1111/ijpo.12507. PubMed  
399 PMID: 30702801.
- 400 18. He F, Bixler EO, Liao J, Berg A, Imamura Kawasawa Y, Fernandez-Mendoza J, et al.  
401 Habitual sleep variability, mediated by nutrition intake, is associated with abdominal obesity in  
402 adolescents. *Sleep medicine*. 2015;16(12):1489-94. Epub 2015/11/28. doi:  
403 10.1016/j.sleep.2015.07.028. PubMed PMID: 26611945; PubMed Central PMCID:  
404 PMCPMC4662770.
- 405 19. Zhou M, Lalani C, Banda JA, Robinson TN. Sleep duration, timing, variability and measures  
406 of adiposity among 8- to 12-year-old children with obesity. *Obesity science & practice*.  
407 2018;4(6):535-44. Epub 2018/12/24. doi: 10.1002/osp4.303. PubMed PMID: 30574347; PubMed  
408 Central PMCID: PMCPMC6298203.
- 409 20. Spruyt K, Molfese DL, Gozal D. Sleep duration, sleep regularity, body weight, and metabolic  
410 homeostasis in school-aged children. *Pediatrics*. 2011;127(2):e345-52. Epub 2011/01/26. doi:  
411 10.1542/peds.2010-0497. PubMed PMID: 21262888; PubMed Central PMCID: PMCPMC3025425.
- 412 21. Garaulet M, Madrid JA. Chronobiology, genetics and metabolic syndrome. *Current opinion in*  
413 *lipidology*. 2009;20(2):127-34. Epub 2009/03/12. doi: 10.1097/MOL.0b013e3283292399. PubMed  
414 PMID: 19276891.
- 415 22. Patterson KAE, Ferrar K, Gall SL, Venn AJ, Blizzard L, Dwyer T, et al. Cluster patterns of  
416 behavioural risk factors among children: Longitudinal associations with adult cardio-metabolic risk  
417 factors. *Prev Med*. 2020;130:105861. Epub 2019/10/28. doi: 10.1016/j.ypmed.2019.105861. PubMed  
418 PMID: 31654729.
- 419 23. Powell KE, King AC, Buchner DM, Campbell WW, DiPietro L, Erickson KI, et al. The  
420 Scientific Foundation for the Physical Activity Guidelines for Americans, 2nd Edition. *Journal of*  
421 *physical activity & health*. 2018;1-11. Epub 2018/12/19. doi: 10.1123/jpah.2018-0618. PubMed  
422 PMID: 30558473.
- 423 24. Ekelund U, Luan J, Sherar LB, Esliger DW, Griew P, Cooper A. Moderate to vigorous  
424 physical activity and sedentary time and cardiometabolic risk factors in children and adolescents.  
425 *Jama*. 2012;307(7):704-12. Epub 2012/02/18. doi: 10.1001/jama.2012.156. PubMed PMID:  
426 22337681; PubMed Central PMCID: PMCPMC3793121.
- 427 25. Magnusson KT, Hrafnkelsson H, Sigurgeirsson I, Johannsson E, Sveinsson T. Limited effects  
428 of a 2-year school-based physical activity intervention on body composition and cardiorespiratory  
429 fitness in 7-year-old children. *Health Educ Res*. 2012;27(3):484-94.
- 430 26. Rognvaldsdottir V, Gudmundsdottir SL, Brychta RJ, Hrafnkelsdottir SM, Gestsdottir S,  
431 Arngrimsson SA, et al. Sleep deficiency on school days in Icelandic youth, as assessed by wrist  
432 accelerometry. *Sleep medicine*. 2017;33:103-8. Epub 2017/04/30. doi: 10.1016/j.sleep.2016.12.028.  
433 PubMed PMID: 28449887; PubMed Central PMCID: PMCPMC6314493.
- 434 27. Sadeh A, Sharkey KM, Carskadon MA. Activity-based sleep-wake identification: an empirical  
435 test of methodological issues. *Sleep*. 1994;17(3):201-7. Epub 1994/04/01. PubMed PMID: 7939118.
- 436 28. Rognvaldsdottir V, Gudmundsdottir SL, Brychta RJ, Hrafnkelsdottir SM, Gestsdottir S,  
437 Arngrimsson SA, et al. Sleep deficiency on school days in Icelandic youth, as assessed by wrist  
438 accelerometry. *Sleep medicine*. doi: <http://dx.doi.org/10.1016/j.sleep.2016.12.028>.

- 439 29. Rognvaldsdottir V, Valdimarsdottir BM, Brychta RJ, Hrafnkelsdottir SM, Arngrimsson SA,  
440 Johannsson E, et al. [Physical activity and sleep in Icelandic adolescents]. *Laeknabladid*.  
441 2018;104(2):79-85. Epub 2018/02/02. doi: 10.17992/lbl.2018.02.173. PubMed PMID: 29388918.
- 442 30. Hrafnkelsdottir S, Brychta R, Rognvaldsdottir V, Gestsdottir S, Chen K, Johannsson E, et al.  
443 Less screen time and more frequent vigorous physical activity is associated with lower risk of  
444 reporting negative mental health symptoms among Icelandic adolescents. *PLoS One*.  
445 2018;13(4):e0196286-e.
- 446 31. Earth System Research Laboratory GMD. NOAA Solar Calculator [U.S. Department of  
447 Commerce]. [cited 2015]. Available from: <https://www.esrl.noaa.gov/gmd/grad/solcalc/>.
- 448 32. Nielsen LS, Danielsen KV, Sorensen TI. Short sleep duration as a possible cause of obesity:  
449 critical analysis of the epidemiological evidence. *Obes Rev*. 2011;12(2):78-92. Epub 2010/03/30. doi:  
450 10.1111/j.1467-789X.2010.00724.x. PubMed PMID: 20345429.
- 451 33. Javaheri S, Storfer-Isser A, Rosen CL, Redline S. Sleep quality and elevated blood pressure in  
452 adolescents. *Circulation*. 2008;118(10):1034-40. Epub 2008/08/20. doi:  
453 10.1161/circulationaha.108.766410. PubMed PMID: 18711015; PubMed Central PMCID:  
454 PMCPMC2798149.
- 455 34. Frankel R, Elangovan A, Kaelber DC. Defining and Diagnosing Elevated Blood Pressure in  
456 Children and Adolescents. *Current Cardiovascular Risk Reports*. 2016;10(12):43. doi:  
457 10.1007/s12170-016-0519-0.
- 458 35. Poitras VJ, Gray CE, Borghese MM, Carson V, Chaput JP, Janssen I, et al. Systematic review  
459 of the relationships between objectively measured physical activity and health indicators in school-  
460 aged children and youth. *Applied physiology, nutrition, and metabolism = Physiologie appliquee,*  
461 *nutrition et metabolisme*. 2016;41(6 Suppl 3):S197-239. Epub 2016/06/17. doi: 10.1139/apnm-2015-  
462 0663. PubMed PMID: 27306431.
- 463 36. Lee S, Deldin AR, White D, Kim Y, Libman I, Rivera-Vega M, et al. Aerobic exercise but not  
464 resistance exercise reduces intrahepatic lipid content and visceral fat and improves insulin sensitivity  
465 in obese adolescent girls: a randomized controlled trial. *Am J Physiol Endocrinol Metab*.  
466 2013;305(10):E1222-9. Epub 2013/09/21. doi: 10.1152/ajpendo.00285.2013. PubMed PMID:  
467 24045865; PubMed Central PMCID: PMCPMC3840217.
- 468 37. Burt J, Dube L, Thibault L, Gruber R. Sleep and eating in childhood: a potential behavioral  
469 mechanism underlying the relationship between poor sleep and obesity. *Sleep medicine*.  
470 2014;15(1):71-5. Epub 2013/11/19. doi: 10.1016/j.sleep.2013.07.015. PubMed PMID: 24239496.
- 471 38. Leproult R, Van Cauter E. Role of sleep and sleep loss in hormonal release and metabolism.  
472 *Endocrine development*. 2010;17:11-21. Epub 2009/12/04. doi: 10.1159/000262524. PubMed PMID:  
473 19955752; PubMed Central PMCID: PMCPMC3065172.
- 474 39. Arora T, Broglia E, Pushpakumar D, Lodhi T, Taheri S. An investigation into the strength of  
475 the association and agreement levels between subjective and objective sleep duration in adolescents.  
476 *PLoS One*. 2013;8(8):e72406.
- 477 40. Short MA, Gradisar M, Lack LC, Wright H, Carskadon MA. The discrepancy between  
478 actigraphic and sleep diary measures of sleep in adolescents. *Sleep medicine*. 2012;13(4):378-84.
- 479 41. Zinkhan M, Berger K, Hense S, Nagel M, Obst A, Koch B, et al. Agreement of different  
480 methods for assessing sleep characteristics: a comparison of two actigraphs, wrist and hip placement,  
481 and self-report with polysomnography. *Sleep medicine*. 2014;15(9):1107-14. Epub 2014/07/16. doi:  
482 10.1016/j.sleep.2014.04.015. PubMed PMID: 25018025.
- 483 42. Martin JL, Hakim AD. Wrist actigraphy. *Chest*. 2011;139(6):1514-27. Epub 2011/06/10. doi:  
484 10.1378/chest.10-1872. PubMed PMID: 21652563; PubMed Central PMCID: PMCPMC3109647.

- 485 43. Andreoli A, Scalzo G, Masala S, Tarantino U, Guglielmi G. Body composition assessment by  
486 dual-energy X-ray absorptiometry (DXA). *La Radiologia medica*. 2009;114(2):286-300. Epub  
487 2009/03/07. doi: 10.1007/s11547-009-0369-7. PubMed PMID: 19266259.
- 488 44. Dezenberg CV, Nagy TR, Gower BA, Johnson R, Goran MI. Predicting body composition  
489 from anthropometry in pre-adolescent children. *International journal of obesity and related metabolic*  
490 *disorders : journal of the International Association for the Study of Obesity*. 1999;23(3):253-9. Epub  
491 1999/04/08. PubMed PMID: 10193870.
- 492 45. Fusch C, Slotboom J, Fuehrer U, Schumacher R, Keisker A, Zimmermann W, et al. Neonatal  
493 body composition: dual-energy X-ray absorptiometry, magnetic resonance imaging, and three-  
494 dimensional chemical shift imaging versus chemical analysis in piglets. *Pediatric research*.  
495 1999;46(4):465-73. Epub 1999/10/06. doi: 10.1203/00006450-199910000-00018. PubMed PMID:  
496 10509370.
- 497 46. Iceland S. Population Inhabitants overview 2018 [cited 2018 Oct, 11. 2018]. Available from:  
498 [https://www.statice.is/statistics/population/inhabitants/overview/?fbclid=IwAR1ZKn2KWzrMRBczbk](https://www.statice.is/statistics/population/inhabitants/overview/?fbclid=IwAR1ZKn2KWzrMRBczbkpbS7-1QPF_rHXU6zvLQN3vhCCStaxWnz4KP82RRmk)  
499 [pbS7-1QPF\\_rHXU6zvLQN3vhCCStaxWnz4KP82RRmk](https://www.statice.is/statistics/population/inhabitants/overview/?fbclid=IwAR1ZKn2KWzrMRBczbkpbS7-1QPF_rHXU6zvLQN3vhCCStaxWnz4KP82RRmk).
- 500 47. Brychta RJ, Arnardottir NY, Johannsson E, Wright EC, Eiriksdottir G, Gudnason V, et al.  
501 Influence of Day Length and Physical Activity on Sleep Patterns in Older Icelandic Men and Women.  
502 *Journal of clinical sleep medicine : JCSM : official publication of the American Academy of Sleep*  
503 *Medicine*. 2016;12(2):203-13. Epub 2015/09/29. doi: 10.5664/jcsm.5486. PubMed PMID: 26414978;  
504 PubMed Central PMCID: PMC4751419.
- 505 48. Rich C, Griffiths LJ, Dezaux C. Seasonal variation in accelerometer-determined sedentary  
506 behaviour and physical activity in children: a review. *International Journal of Behavioral Nutrition and*  
507 *Physical Activity*. 2012;9(1):49. doi: 10.1186/1479-5868-9-49.
- 508
- 509



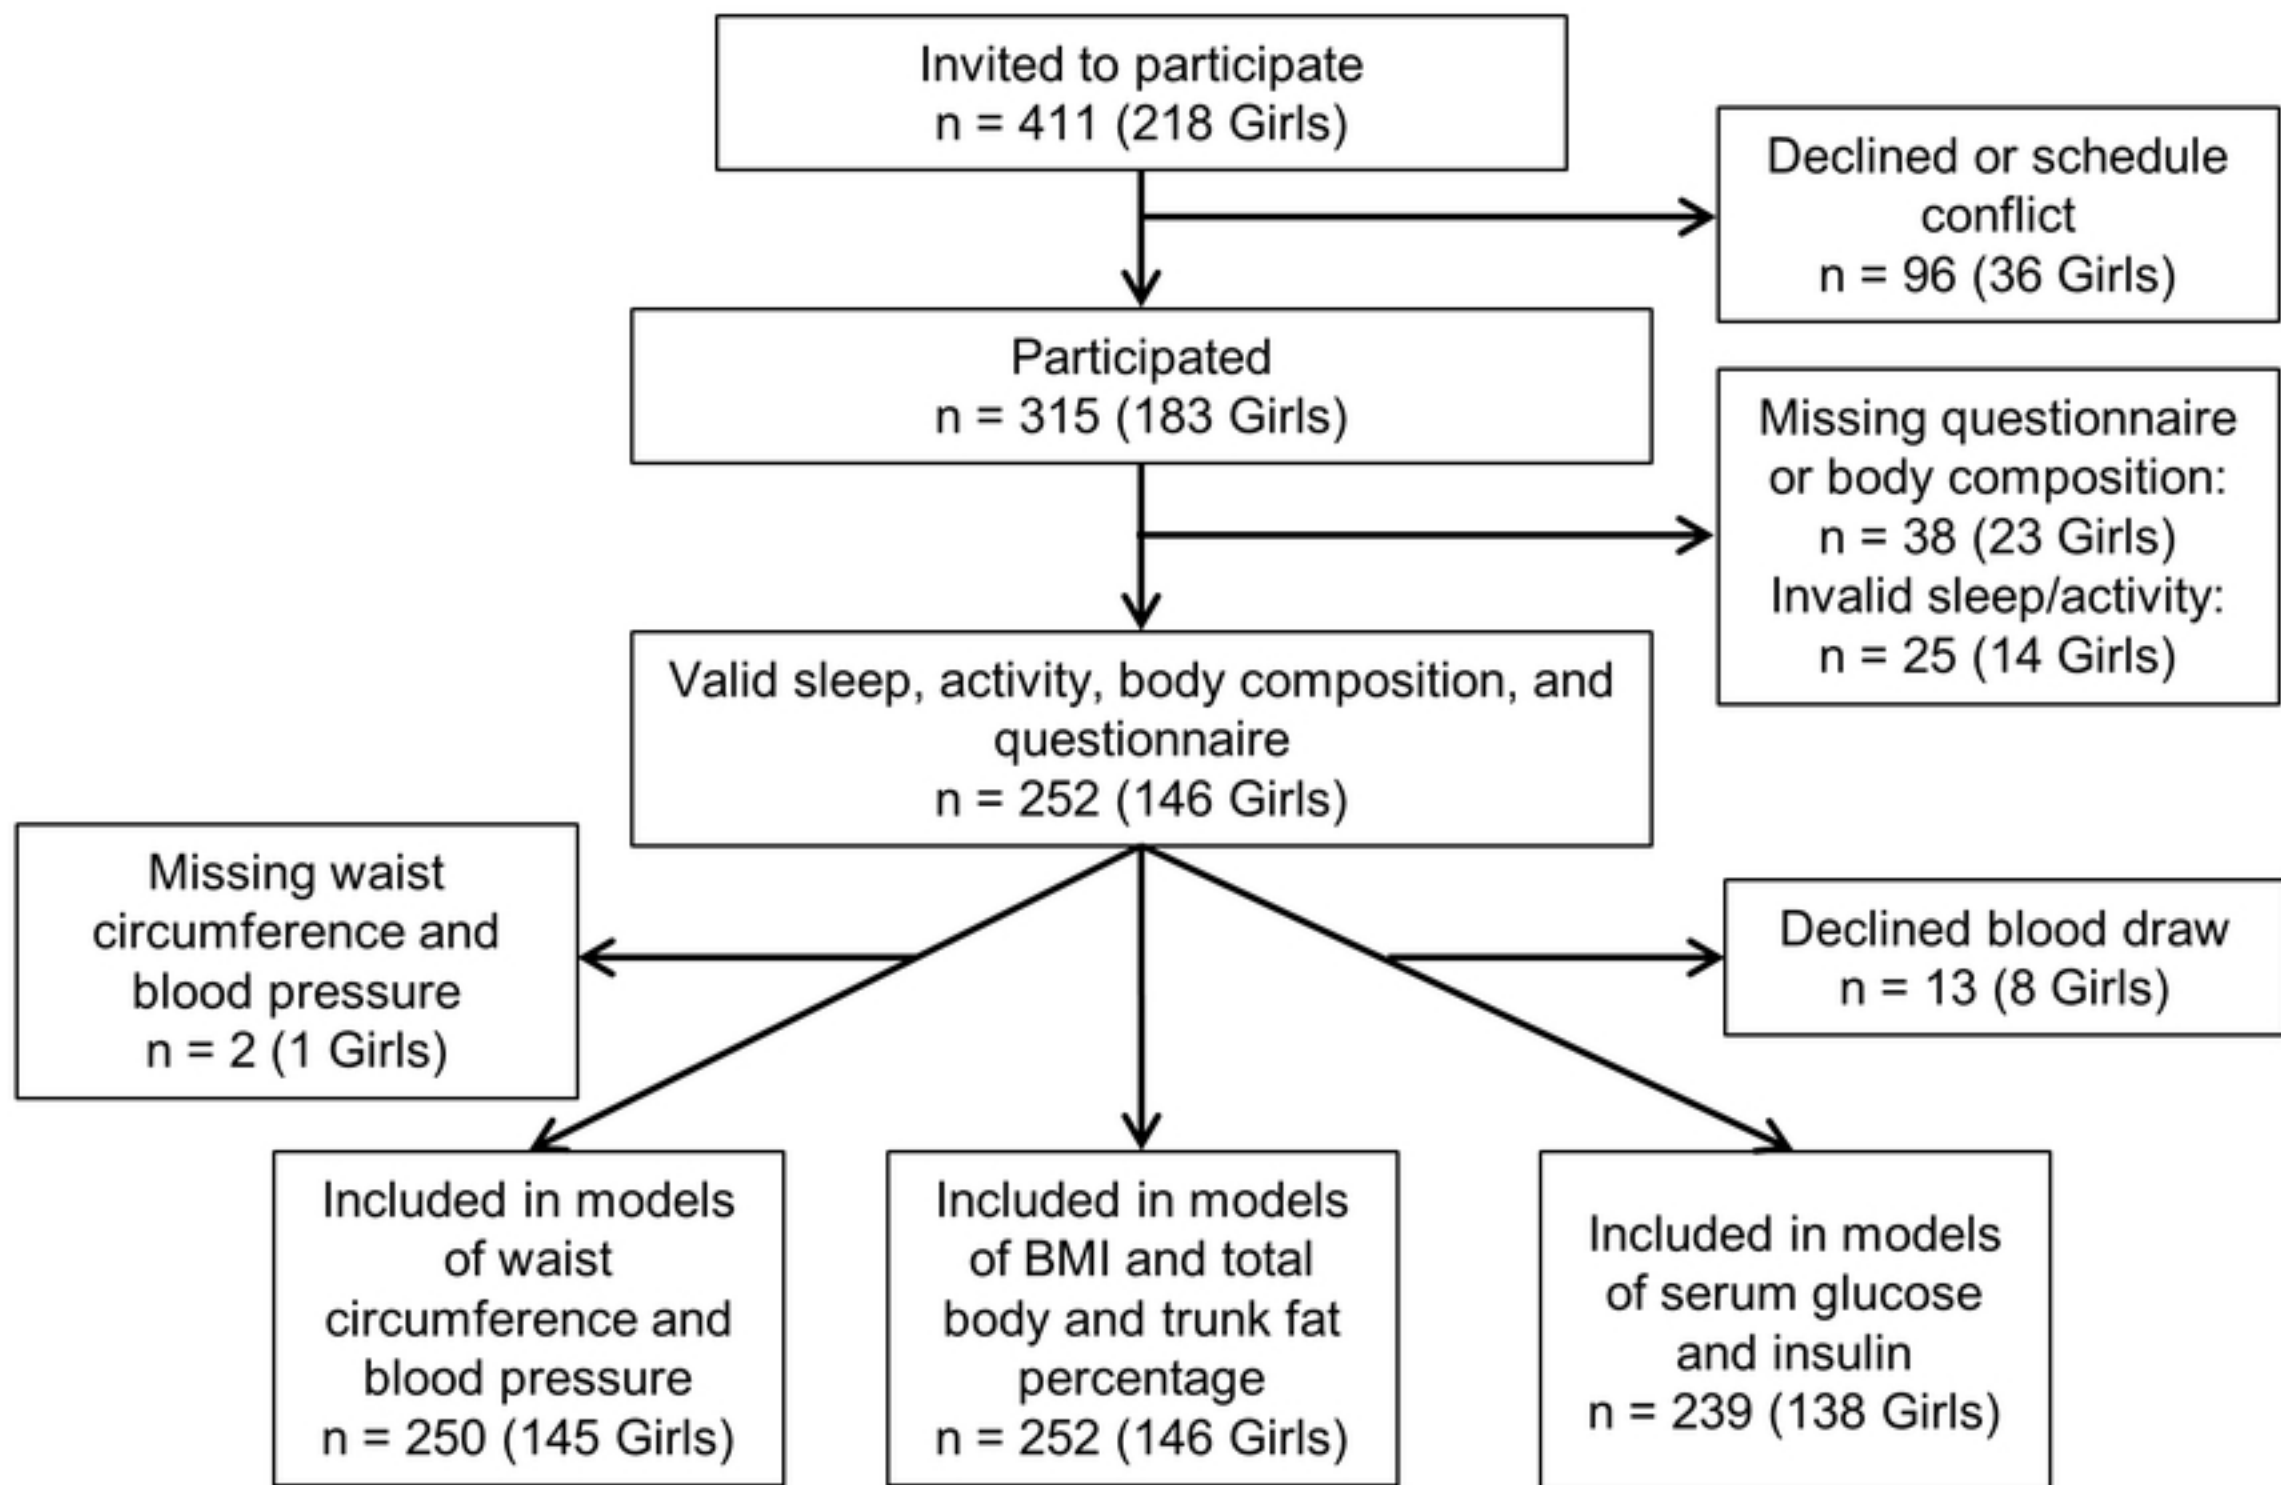

Figure
